# Supplementary material for: Storage Stability and In Vitro Bioaccessibility of Microencapsulated Tomato (Solanum Lycopersicum L.) Pomace Extract
Source: MDPI journal article supplement (doi:10.3390/bioengineering9070311), 2022-07-13
Supplement: s1 [file s1]

## Storage stability and in vitro bioaccessibility of microencapsulated tomato (*Solanum lycopersicum* L.) pomace extract

Luiz C. Corrêa-Filho, Diana I. Santos, Luísa Brito, Margarida Moldão-Martins and Vítor D. Alves\*

LEAF—Linking Landscape, Environment, Agriculture and Food, Associated Laboratory TERRA, Instituto Superior de Agronomia, Universidade de Lisboa, Tapada da Ajuda, 1349-017 Lisboa, Portugal; lucaal-bernaz@gmail.com (L.C.C.-F.); dianaisasantos@isa.ulisboa.pt (D.I.S.); lbrito@isa.ulisboa.pt (L.B.); mmoldao@isa.ulisboa.pt (M.M.-M.)

\* Correspondence: vitoralves@isa.ulisboa.pt; Tel.: +351-21-365-3195

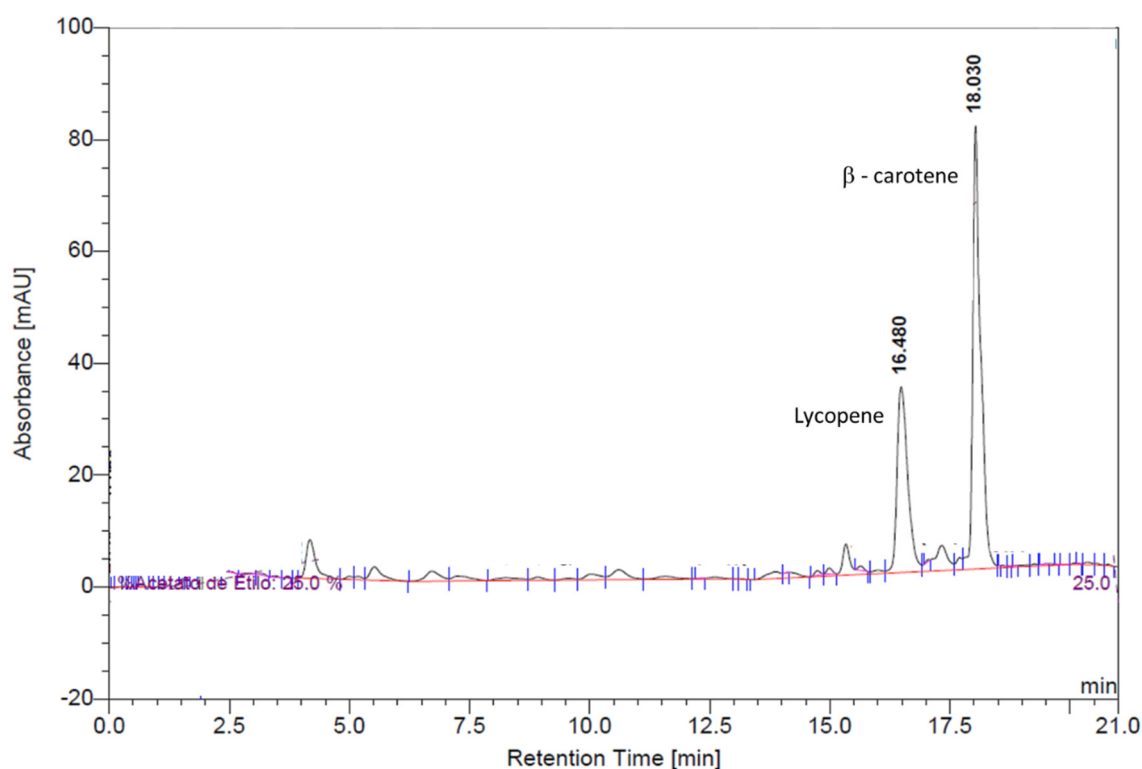

**Figure S1.** HPLC chromatogram obtained with a DAD-3000 diode-array detector, with a wavelength of 475 and 472 nm for lycopene and 440 nm for  $\beta$ -carotene, upon tomato pomace extract analysis.
